# Supplementary material for: Clinical epigenomics: genome-wide DNA methylation analysis for the diagnosis of Mendelian disorders
Source: PubMed Central journal article supplement (PMC8187150; doi:10.1038/s41436-020-01096-4), 2021-02-05
Supplement: 41436_2020_1096_MOESM1_ESM.pdf [file 41436_2020_1096_MOESM1_ESM.pdf]

Figure S1

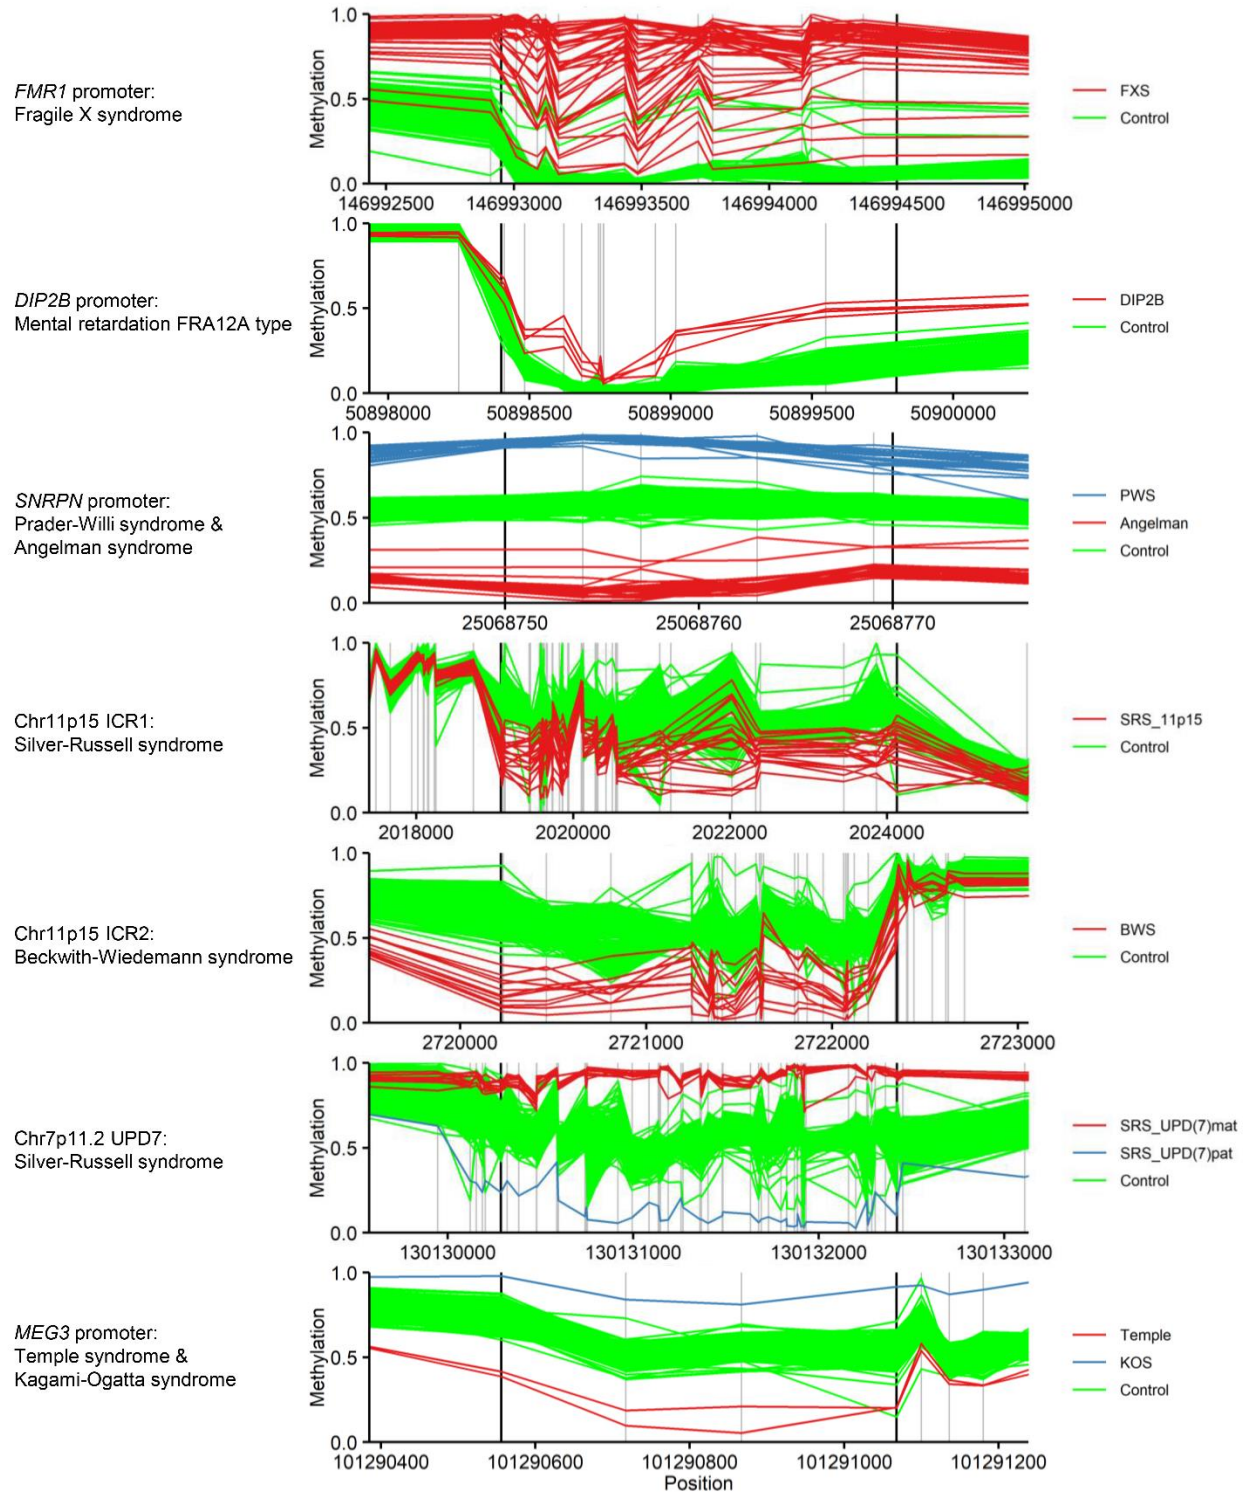

Figure S2

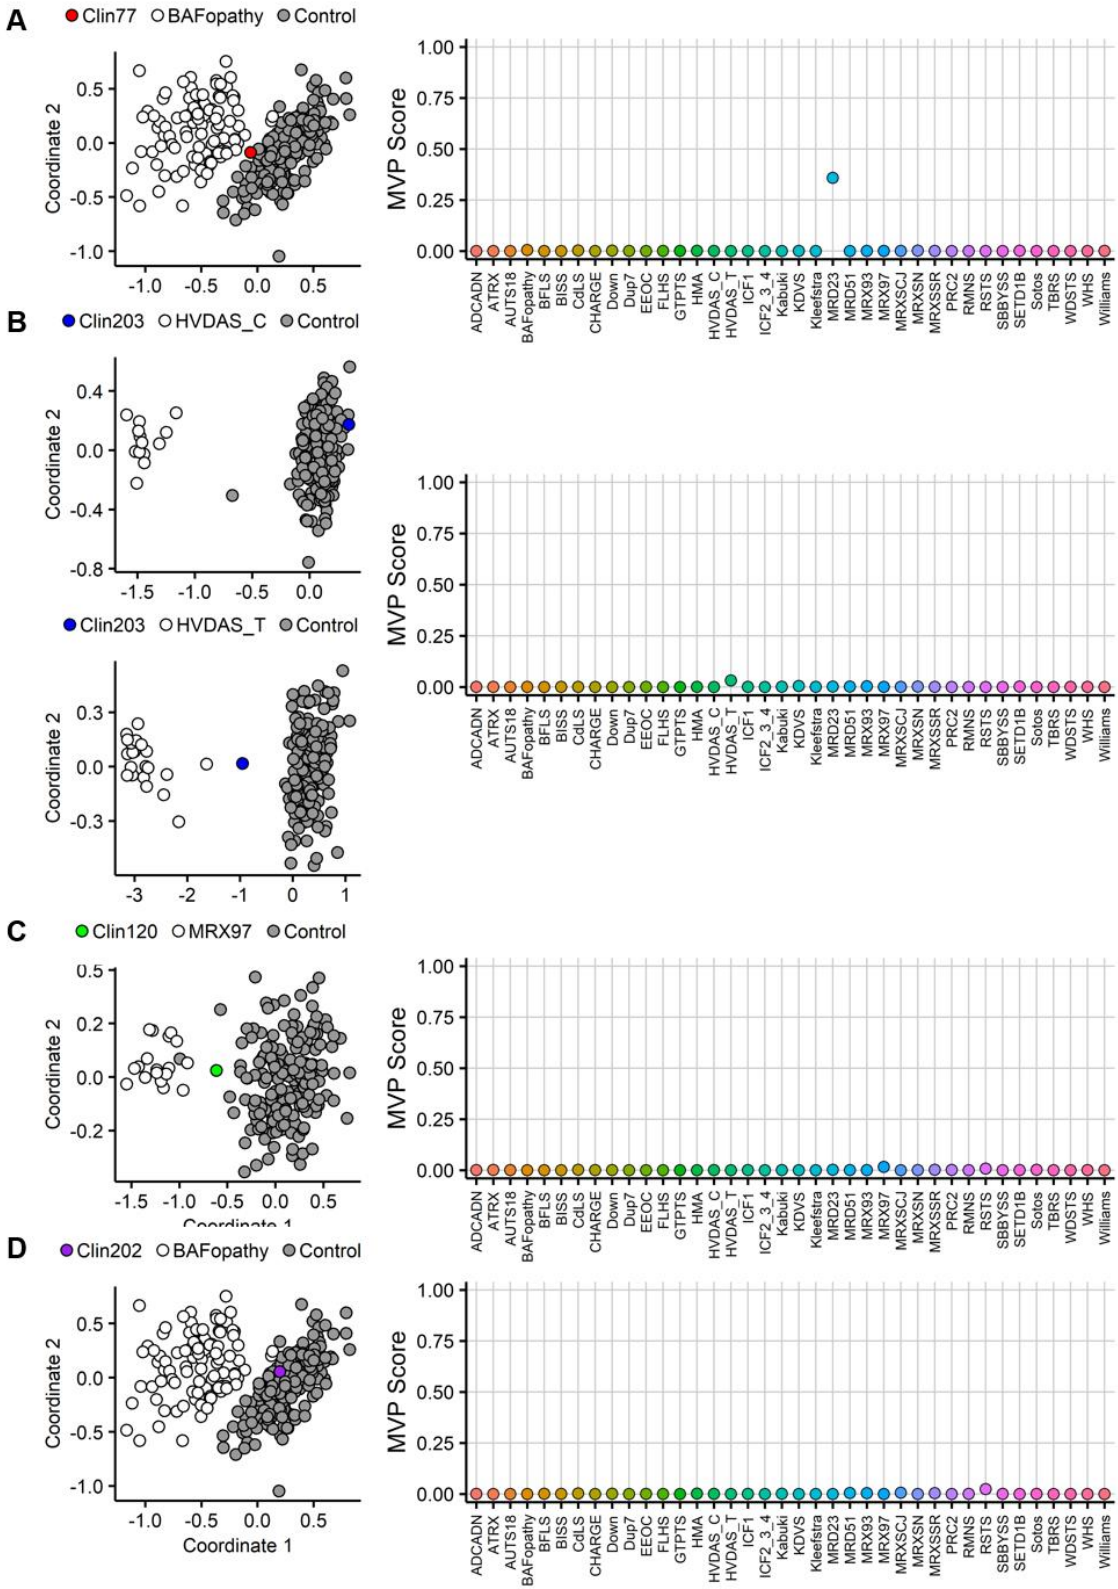

Table S3

| <b>Validation Cohort</b>                              | <b>Total</b> | <b>EpiSign Concordant</b> |
|-------------------------------------------------------|--------------|---------------------------|
| Normal Control                                        | 58           | 58                        |
| EpiSign Positive                                      | 123          | 119                       |
| Imprinting Positive                                   | 21           | 21                        |
| Imprinting low level mosaics (not EpiSign detectable) | 9            | 9                         |
| <b>Total samples</b>                                  | <b>211</b>   | <b>207</b>                |

| <b>Clinical Testing Cohort</b> | <b>Total</b> | <b>EpiSign Positive</b> | <b>EpiSign Negative</b> | <b>Inconclusive</b> |
|--------------------------------|--------------|-------------------------|-------------------------|---------------------|
| Targeted Analysis              | 136          | 48                      | 86                      | 2                   |
| Screening Analysis             | 71           | 9                       | 60                      | 2                   |
| <b>Total Samples</b>           | <b>207</b>   | <b>57</b>               | <b>146</b>              | <b>4</b>            |

## Legends:

Figure S1. EpiSign DNA methylation profiles for imprinting disorders and Fragile X. Methylation levels (y-axis) are plotted against the genomic coordinates (x-axis) for subjects with the respective disorders, and control subjects. The black vertical lines indicate the borders of the region assayed for diagnostic testing, grey and black vertical lines indicate the locations of CpG probes.

Figure S2. DNA methylation (EpiSign) analysis of the inconclusive clinical cases. MDS plot and MVP score for A. Case Clin77 (ARID2:c.988\_1008del, p.(Leu330\_Gly336del)); B. Case Clin203 (ADNP:c.46C>G, p.(Arg16Gly)); C. Case Clin120 (no genetic variant identified); and D. Case Clin202 (no genetic variant identified).
